# Supplementary material for: Simple preparation method of Pd nanoparticles on an Au electrode and its catalysis for dioxygen reductionElectronic supplementary information (ESI) available: XRD pattern of an evaporated Au electrode and CVs for the reduction of O2 on a bare Au(111) electrode or a Pd-nanoparticle-film-modified electrode. See: http://www.rsc.org/suppdata/nj/b3/b300566f/
Source: Royal Society of Chemistry journal article supplement (doi:10.1039/b300566f), 2003-01-01
Supplement: b300566f.doc [file b300566f.doc]

# Supporting information

*Author*:Yan Shen, Lihua Bi, Baifeng Liu, and Shaojun Dong*

*Title*: **Simple Preparation Method of Pd Nanoparticles on Au Electrode and Its Catalysis for Dioxygen**

*The journal:* **New Journal of Chemistry**

1. XRD pattern of a gold electrode evaporated on a glass slide (Au/glass slide).

XRD measurement was carried out using a RINT-2200 (RIGAKU) with a four-circle diffractometer. Figure S1 shows the XRD pattern of a gold electrode evaporated on a glass slide. Only Au (111) and Au (222) reflections were observed for the Au/glass slide as shown in Figure S1.

2. Cyclic voltammograms obtained for the O2 reduction at: (a) bare Au (111) single-crystal electrode and (b) Pd nanoparticles-deposited Au (111) single-crystal electrode in 0.1 M KCl solution.

Figure S2 illustrates representative cyclic voltammograms for oxygen reduction at bare Au (111) electrode and Pd nanoparticles film modified electrode in 0.1 M KCl. As can be seen that Pd nanoparticles film electrodeposited on Au (111) electrode exhibits high catalytic activity for oxygen reduction. So the catalytic properties of the Pd particles seem not to be dependent upon the Au surface underneath and the surface roughness.

Figure S1

Figure S2
